# Supplementary material
Source: publisher site journal article supplement (https://www.dovepress.com/get_supplementary_file.php?f=454876.docx)
Supplement: Supplementary file 1 [file get_supplementary_file.php]

**Table S1 Association of baseline TyG index and the incidence of left ventricular hypertrophy in the non-diabetic participants**.

|  | Crude | | Model 1a | | Model 2b | |
| --- | --- | --- | --- | --- | --- | --- |
| TyG groups | HR (95% CI) | *P* value | HR (95% CI) | *P* value | HR (95% CI) | *P* value |
| Q1 | ref |  | ref |  | ref |  |
| Q2 | 2.384(1.529,3.717) | <0.001 | 1.717(1.098,2.685) | 0.018 | 1.414(0.899,2.224) | 0.134 |
| Q3 | 3.134(2.039,4.816) | <0.001 | 2.150(1.391,3.325) | 0.001 | 1.656(1.057,2.594) | 0.028 |
| Q4 | 4.183(2.736,6.397) | <0.001 | 2.749(1.781,4.244) | <0.001 | 1.829(1.161,2.880) | 0.009 |

a In the Model 1, the adjustment factors included age and sex.

b In the Model 2, the adjustment factors included age, sex, low-density lipoprotein cholesterol (LDL-c), body mass index (BMI), alanine transaminase (ALT), hypertension, blood urea nitrogen (BUN), uric acid (UA).

**Abbreviations:** TyG, triglyceride and glucose, HR, hazard ratio; CI, confidence interval.

*P* values were calculated by cox proportional hazards model.

**Table S2 Association of baseline TyG index and the incidence of left ventricular hypertrophy in the non-hypertensive participants**.

|  | Crude | | Model 1a | | Model 2b | |
| --- | --- | --- | --- | --- | --- | --- |
| TyG groups | HR (95% CI) | *P* value | HR (95% CI) | *P* value | HR (95% CI) | *P* value |
| Q1 | ref |  | ref |  | ref |  |
| Q2 | 2.821(1.586,5.017) | <0.001 | 1.970(1.103,3.520) | 0.022 | 1.692(0.942,3.038) | 0.078 |
| Q3 | 4.251(2.453,7.365) | <0.001 | 2.697(1.543,4.712) | <0.001 | 2.126(1.203,3.757) | 0.009 |
| Q4 | 5.553(3.235,9.533) | <0.001 | 3.343(1.924,5.810) | <0.001 | 2.482(1.403,4.389) | 0.002 |

a In the Model 1, the adjustment factors included age and sex.

b In the Model 2, the adjustment factors included age, sex, low-density lipoprotein cholesterol (LDL-c), body mass index (BMI), alanine transaminase (ALT), hypertension, blood urea nitrogen (BUN), uric acid (UA).

**Abbreviations:** TyG, triglyceride and glucose, HR, hazard ratio; CI, confidence interval.

*P* values were calculated by cox proportional hazards model.

**Table S3 Association of baseline TyG index and the incidence of decreased left ventricular diastolic function with preserved ejection fraction in the non-diabetic participants**.

|  | Crude | | Model 1a | | Model 2b | |
| --- | --- | --- | --- | --- | --- | --- |
| TyG groups | HR (95% CI) | *P* value | HR (95% CI) | *P* value | HR (95% CI) | *P* value |
| Q1 | ref |  | ref |  | ref |  |
| Q2 | 1.313(1.117,1.543) | 0.001 | 1.206(1.024,1.420) | 0.025 | 1.147(0.970,1.356) | 0.108 |
| Q3 | 1.432(1.223,1.677) | <0.001 | 1.267(1.076,1.492) | 0.004 | 1.161(0.976,1.381) | 0.092 |
| Q4 | 1.438(1.220,1.696) | <0.001 | 1.414(1.187,1.684) | <0.001 | 1.243(1.029,1.502) | 0.024 |

a In the Model 1, the adjustment factors included age and sex.

b In the Model 2, the adjustment factors included age, sex, low-density lipoprotein cholesterol (LDL-c), body mass index (BMI), alanine transaminase (ALT), hypertension, blood urea nitrogen (BUN), uric acid (UA).

**Abbreviations:** TyG, triglyceride and glucose; HR, hazard ratio; CI, confidence interval.

*P* values were calculated by cox proportional hazards model.

**Table S4 Association of baseline TyG index and the incidence of decreased left ventricular diastolic function with preserved ejection fraction in the non-hypertensive participants**.

|  | Crude | | Model 1a | | Model 2b | |
| --- | --- | --- | --- | --- | --- | --- |
| TyG groups | HR (95% CI) | *P* value | HR (95% CI) | *P* value | HR (95% CI) | *P* value |
| Q1 | ref |  | ref |  | ref |  |
| Q2 | 1.377(1.162,1.633) | <0.001 | 1.168(0.983,1.389) | 0.078 | 1.114(0.933,1.329) | 0.232 |
| Q3 | 1.529(1.295,1.806) | <0.001 | 1.286(1.082,1.528) | 0.004 | 1.191(0.992,1.429) | 0.060 |
| Q4 | 1.572(1.328,1.860) | <0.001 | 1.446(1.208,1.731) | <0.001 | 1.311(1.081,1.589) | 0.006 |

a In the Model 1, the adjustment factors included age and sex.

b In the Model 2, the adjustment factors included age, sex, low-density lipoprotein cholesterol (LDL-c), body mass index (BMI), alanine transaminase (ALT), hypertension, blood urea nitrogen (BUN), uric acid (UA).

**Abbreviations:** TyG, triglyceride and glucose; HR, hazard ratio; CI, confidence interval.

*P* values were calculated by cox proportional hazards model.

**Table S5 Association of HOMA-IR and the incidence of left ventricular hypertrophy in the longitudinal cohort study**.

|  | Crude | | Model 1a | | Model 2b | |
| --- | --- | --- | --- | --- | --- | --- |
|  | HR (95% CI) | *P* value | HR (95% CI) | *P* value | HR (95% CI) | *P* value |
| HOMA-IR<2.5 | ref |  | ref |  | ref |  |
| HOMA-IR≥2.5 | 2.220(1.752,2.812) | <0.001 | 1.890(1.491,2.397) | <0.001 | 1.353(1.053,1.738) | 0.018 |

a In the Model 1, the adjustment factors included age and sex.

b In the Model 2, the adjustment factors included age, sex, low-density lipoprotein cholesterol (LDL-c), body mass index (BMI), alanine transaminase (ALT), hypertension, blood urea nitrogen (BUN), uric acid (UA).

**Abbreviations:** HOMA-IR, homeostatic model assessment of insulin resistance; HR, hazard ratio; CI, confidence interval.

*P* values were calculated by cox proportional hazards model.

**Table S6 Association of HOMA-IR and the incidence of decreased left ventricular diastolic function with preserved ejection fraction in the longitudinal cohort study**.

|  | Crude | | Model 1a | | Model 2b | |
| --- | --- | --- | --- | --- | --- | --- |
|  | HR (95% CI) | *P* value | HR (95% CI) | *P* value | HR (95% CI) | *P* value |
| HOMA-IR<2.5 | ref |  | ref |  | ref |  |
| HOMA-IR≥2.5 | 1.320(1.185，1.470) | <0.001 | 1.274(1.142,1.420) | <0.001 | 1.144(1.017,1.286) | 0.025 |

a In the Model 1, the adjustment factors included age and sex.

b In the Model 2, the adjustment factors included age, sex, low-density lipoprotein cholesterol (LDL-c), body mass index (BMI), alanine transaminase (ALT), hypertension, blood urea nitrogen (BUN), uric acid (UA).

**Abbreviations:** HOMA-IR, homeostatic model assessment of insulin resistance; HR, hazard ratio; CI, confidence interval.

*P* values were calculated by cox proportional hazards model.
